# Supplementary material for: The Presence of Cough and Tuberculosis: Active Case Finding Outcomes in the Philippines
Source: PubMed Central journal article supplement (PMC6719270; doi:10.1155/2019/4578329), 2019-08-21
Supplement: 4578329.f1.pdf [file 4578329.f1.pdf]

## Supplementary Materials

Figure S1. ICM Health Check Card

**ICM** INTERNATIONAL CAPSULE NETWORK

Participant name: \_\_\_\_\_ Health Check Card (June 2014) Trainer: \_\_\_\_\_  
 Community/ID: \_\_\_\_\_ Pastor: \_\_\_\_\_ Batch: \_\_\_\_\_

| Adult: 15 years old and above                                           | Name of adult with cough | Age                  | Name of adult with cough | Age                  |
|-------------------------------------------------------------------------|--------------------------|----------------------|--------------------------|----------------------|
| Do you or any adult in your household have cough for more than 2 weeks? | <input type="text"/>     | <input type="text"/> | <input type="text"/>     | <input type="text"/> |

  

| Children: 0 -14 years old                                                                         | Name of child with symptoms           | Age                  | Name of child with symptoms           | Age                  |
|---------------------------------------------------------------------------------------------------|---------------------------------------|----------------------|---------------------------------------|----------------------|
| Is there a child or children in your household that has any of the following symptoms?            | <input type="text"/>                  | <input type="text"/> | <input type="text"/>                  | <input type="text"/> |
|                                                                                                   | Check the symptoms that the child has |                      | Check the symptoms that the child has |                      |
| 1. Cough for more than 2 weeks                                                                    | <input type="text"/>                  |                      | <input type="text"/>                  |                      |
| 2. Fever for more than 2 weeks                                                                    | <input type="text"/>                  |                      | <input type="text"/>                  |                      |
| 3. Significant/unintentional weight loss                                                          | <input type="text"/>                  |                      | <input type="text"/>                  |                      |
| 4. Fatigue, lethargy, general malaise                                                             | <input type="text"/>                  |                      | <input type="text"/>                  |                      |
| 5. Failure to respond to appropriate antibiotic therapy after two weeks                           | <input type="text"/>                  |                      | <input type="text"/>                  |                      |
| 6. Failure to regain previous state of health after two week following a presumed viral infection | <input type="text"/>                  |                      | <input type="text"/>                  |                      |

Figure S2. ICM RHU referral card

**ICM** INTERNATIONAL CAPSULE NETWORK **ICM – RHU REFERRAL CARD**

To: \_\_\_\_\_ Date of Referral: \_\_\_\_\_  
 (Name of Facility)

Reason for Referral (symptom): \_\_\_\_\_

\_\_\_\_\_

Name of Patient: \_\_\_\_\_

Present Address: \_\_\_\_\_

Age: \_\_\_\_\_ Sex:  Male  Female

Patient contact no: \_\_\_\_\_

Referred By: \_\_\_\_\_

✂-----

**ICM Return Slip**

Name of RHU/MHU staff: \_\_\_\_\_

Designation: \_\_\_\_\_ Date Received: \_\_\_\_\_

Patient: \_\_\_\_\_

Diagnosis: \_\_\_\_\_ Sputum AFB? Yes / No

Treatment: \_\_\_\_\_

Figure S3. TB follow-up sheet used by ICM staff to collect data on TB symptom positive participants

**Dipolog TB Eradication Program** ☆ 🔄  
 File Edit View Insert Format Data Tools Add-ons Help All changes saved in Drive

100% £ % .0 .00 123 Arial 10 B I S A

|   |                           |           |              |                                                |            |             |     |                                             |                                          |                                  |                                          |                                               |  |
|---|---------------------------|-----------|--------------|------------------------------------------------|------------|-------------|-----|---------------------------------------------|------------------------------------------|----------------------------------|------------------------------------------|-----------------------------------------------|--|
| 1 |                           |           |              |                                                |            |             |     |                                             |                                          |                                  |                                          |                                               |  |
| 2 | <b>No. Stage 1 forms:</b> | 1,282     |              | <b>No. Stage 2 forms returned by trainers:</b> | 44         |             |     | <b>No. RHU referrals given to patients:</b> | 346                                      |                                  | <b>No. patient lists given to RHU's:</b> | 73                                            |  |
| 3 | <b>Community</b>          |           |              | <b>Patient details</b>                         |            |             |     | <b>First stage screening</b>                |                                          | <b>Second stage screening</b>    |                                          |                                               |  |
| 5 | Health Trainer            | Community | Community ID | Patient Name                                   | Contact No | Age (Years) | sex | Participant or Household member?            | Symptom(s) - List all ticked for a child | Was second stage screening done? | Date of second stage screening           | Referral to RHU required after second screen? |  |

**Dipolog TB Eradication Program** ☆ 🔄  
 File Edit View Insert Format Data Tools Add-ons Help All changes saved in Drive

100% £ % .0 .00 123 Arial 10 B I S A

|   |                                   |                                           |                                                      |                        |                           |               |                                                     |         |                                          |                             |                          |     |  |
|---|-----------------------------------|-------------------------------------------|------------------------------------------------------|------------------------|---------------------------|---------------|-----------------------------------------------------|---------|------------------------------------------|-----------------------------|--------------------------|-----|--|
| 1 |                                   |                                           |                                                      |                        |                           |               |                                                     |         |                                          |                             |                          |     |  |
| 2 |                                   | <b>No. communities visited by midwife</b> |                                                      |                        | 16                        |               | <b>No. TB cases diagnosed to date during batch:</b> |         | 3                                        |                             | <b>Manna Packs Given</b> | 180 |  |
| 3 | <b>RHU referral and diagnosis</b> |                                           |                                                      |                        |                           |               |                                                     |         |                                          |                             | <b>Progress update</b>   |     |  |
| 5 | Date of referral to RHU           | Date attended RHU                         | RHU assessment (e.g. asthma, pneumonia, possible TB) | Sputum test required ? | Date of sputum collection | Sputum result | Other test result (CXR/PPD)                         | Outcome | If TB confirmed, date enrolled onto DOTS | Date patient last contacted | Update                   |     |  |

Table S4. Literacy rate among program participants

| Literacy   | Screened | %      | Referred | %      | Attended | %      |
|------------|----------|--------|----------|--------|----------|--------|
| Illiterate | 1708     | 36.85% | 420      | 32.56% | 109      | 32.73% |
| Literate   | 2441     | 52.66% | 707      | 54.81% | 172      | 51.65% |
| N/A*       | 486      | 10.49% | 163      | 12.64% | 52       | 15.62% |

\*participant data was absent

Table S5. Children versus adults at each stage

| Category | Screened | %      | Referred | %      | Attended | %      |
|----------|----------|--------|----------|--------|----------|--------|
| Children | 1708     | 36.85% | 315      | 24.42% | 81       | 24.32% |
| Adult    | 2863     | 61.77% | 968      | 75.04% | 248      | 74.47% |
| N/As*    | 64       | 1.38%  | 7        | 0.54%  | 4        | 1.20%  |

\*some participants' age were missing from the data set.

Figure S6. Histogram of participants identified with different Number of Symptoms

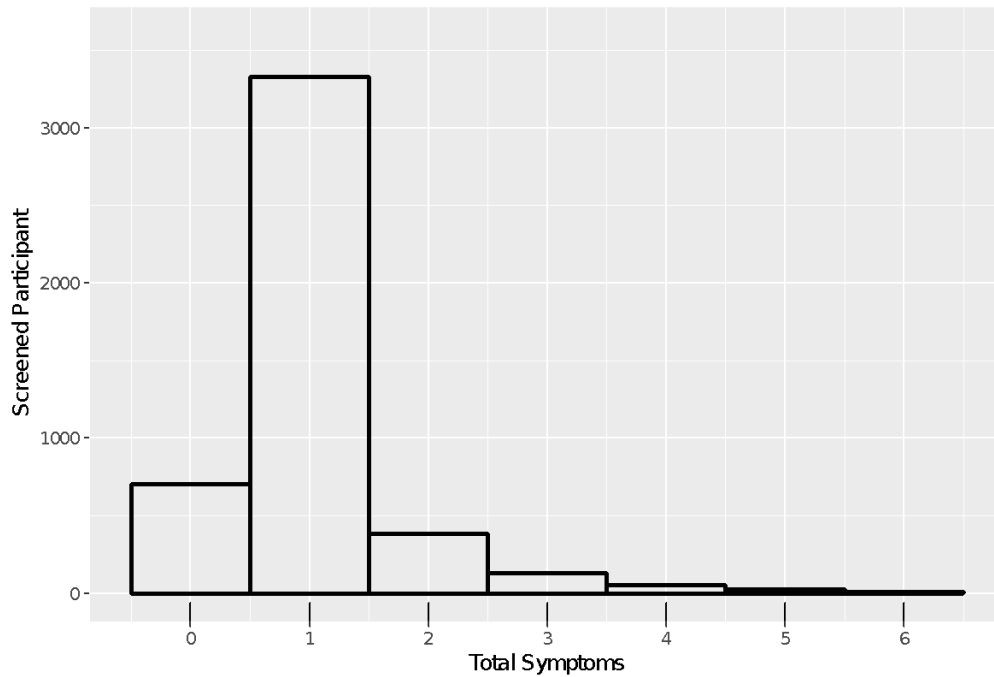

Table S7. Univariate analysis of all symptom variables

| Coefficients     | Estimate | Std. Error | Pr(> t )   |
|------------------|----------|------------|------------|
| (Intercept)      | 0.13     | 0.03       | <0.001 *** |
| cough.2wks       | 0.16     | 0.03       | <0.001 *** |
| <b>AIC: 1507</b> |          |            |            |
| Coefficients     | Estimate | Std. Error | Pr(> t )   |
| (Intercept)      | 0.25     | 0.01       | <0.001 *** |
| fever.2wks       | 0.09     | 0.05       | 0.102      |

|                  |  |  |  |  |
|------------------|--|--|--|--|
| <b>AIC: 1532</b> |  |  |  |  |
|------------------|--|--|--|--|

| <b>Coefficients:</b> | <b>Estimate</b> | <b>Std. Error</b> | <b>Pr(&gt; t )</b> |     |
|----------------------|-----------------|-------------------|--------------------|-----|
| <b>(Intercept)</b>   | 0.25            | 0.01              | <0.001             | *** |
| <b>weight.loss</b>   | 0.06            | 0.05              | 0.182              |     |

|                    |  |  |  |  |
|--------------------|--|--|--|--|
| <b>AIC: 1532.9</b> |  |  |  |  |
|--------------------|--|--|--|--|

| <b>Coefficients:</b> | <b>Estimate</b> | <b>Std. Error</b> | <b>Pr(&gt; t )</b> |     |
|----------------------|-----------------|-------------------|--------------------|-----|
| <b>(Intercept)</b>   | 0.25            | 0.01              | <0.001             | *** |
| <b>gen.malaise</b>   | 0.11            | 0.06              | 0.0643             | .   |

|                    |  |  |  |  |
|--------------------|--|--|--|--|
| <b>AIC: 1531.3</b> |  |  |  |  |
|--------------------|--|--|--|--|

| <b>Coefficients:</b>    | <b>Estimate</b> | <b>Std. Error</b> | <b>Pr(&gt; t )</b> |     |
|-------------------------|-----------------|-------------------|--------------------|-----|
| <b>(Intercept)</b>      | 0.26            | 0.01              | <0.001             | *** |
| <b>antibiotics.2wks</b> | 0.05            | 0.92              | 0.61               |     |

|                    |  |  |  |  |
|--------------------|--|--|--|--|
| <b>AIC: 1534.4</b> |  |  |  |  |
|--------------------|--|--|--|--|

| <b>Coefficients:</b> | <b>Estimate</b> | <b>Std. Error</b> | <b>Pr(&gt; t )</b> |     |
|----------------------|-----------------|-------------------|--------------------|-----|
| <b>(Intercept)</b>   | 0.26            | 0.01              | <0.001             | *** |
| <b>virus.2wks</b>    | -0.15           | 0.10              | 0.151              |     |

|                    |  |  |  |  |
|--------------------|--|--|--|--|
| <b>AIC: 1532.6</b> |  |  |  |  |
|--------------------|--|--|--|--|
